# Supplementary material for: Factors influencing on-scene time in a rural Norwegian helicopter emergency medical service: a retrospective observational study
Source: Scand J Trauma Resusc Emerg Med. 2017 Sep 21;25:97. doi: 10.1186/s13049-017-0442-5 (PMC5609050; doi:10.1186/s13049-017-0442-5)
Supplement: Supplementary file 6 — Factors affecting on-scene time (simple linear model) in penetrating torso injuries. (XLS 33 kb) [file 13049_2017_442_MOESM6_ESM.xls]

## Sheet: Ark1
Additional file 6 Factors affecting on-scene time (simple linear model) in penetrating torso injuries
Penetrating torso injuries and NACA 4–6 (N=767)
(median OST = 5 min)
Predictor	Unadjusted model				Fully adjusted model				Final model b
		N=57			N=56				N=56
	B	95% CI	p-value		B	95% CI	p-value		B	95% CI	p-value
Year in study period a	-0.52	(-1.98, 0.94)	0.478		0.21	(-1.36, 1.78)	0.793		-	-	-
Daylight (yes )	3.93	(-0.05, 7.91)	0.053		2.84	(-1.18, 6.86)	0.162		3.12	(-0.54, 6.78)	0.093
Age	-0.03	(-0.19, 0.14)	0.737		0.08	(-0.08, 0.24)	0.336		-	-	-
Male gender (yes)	-1.96	(-6.99, 3.06)	0.437		-4.22	(-9.40, 0.96)	0.108		-	-	-
NACA score	1.03	(-1.89, 3.94)	0.483		2.47	(-0.91, 5.84)	0.148		-	-	-
Glasgow Coma Scale	0.06	(-0.69, 0.82)	0.867		-0.57	(-2.03, 0.88)	0.431		-	-	-
Treatment prior to HEMS (yes)	-0.05	(-4.37, 4.26)	0.980		-2.27	(-6.73, 2.19)	0.310		-	-	-
Experience (years as specialist)	-0.46	(-0.92, 0.01)	0.053		-0.28	(-0.76, 0.20)	0.253		-0.40	(-0.82, 0.03)	0.066
Analgesics (yes )	7.23	(2.18, 12.28)	0.006		6.56	(-0.59, 13.70)	0.071		4.14	(-1.22, 9.49)	0.127
Intubation (yes )	2.43	(-6.78, 11.63)	0.599		-4.34	(-18.57, 9.89)	0.542		-	-	-
Helicopter transport (yes)	5.72	(1.69, 9.75)	0.006		5.19	(0.41, 9.96)	0.034		3.85	(-0.39, 8.10)	0.074
a Year in study period refers to year 1-5 of the period from 2009 to 2013. b Variables chosen for final model included multivariate regression analyses of variables that differed significantly. B = unstandardized coefficient in the regression model (minutes per unit of predictor). Positive values are associated with increased OST. Fully adjusted model is an intermediate calculation step to select…
