# Supplementary material for: Factors influencing on-scene time in a rural Norwegian helicopter emergency medical service: a retrospective observational study
Source: Scand J Trauma Resusc Emerg Med. 2017 Sep 21;25:97. doi: 10.1186/s13049-017-0442-5 (PMC5609050; doi:10.1186/s13049-017-0442-5)
Supplement: Supplementary file 7 — Factors affecting on-scene time (linear mixed effect model) in cardiac arrest. (XLS 33 kb) [file 13049_2017_442_MOESM7_ESM.xls]

## Sheet: Ark1
Additional file 7 Factors affecting on-scene time (linear mixed effect model) in cardiac arrest
Cardiac arrest and NACA 4–6 (N=659)
(median OST = 20 min)
Predictor	Unadjusted model				Fully adjusted model				Final model b
		N=659			N=656				N=656
	B	95% CI	p-value		B	95% CI	p-value		B	95% CI	p-value
Year in study period a	0.48	(-0.23, 1.20)	0.183		0.58	(-0.09, 1.24)	0.094		0.56	(-0.09, 1.22)	0.095
Daylight (yes )	1.44	(-0.56, 3.45)	0.159		1.67	(-0.16, 3.51)	0.077		1.67	(-0.17, 3.50)	0.078
Age	-0.10	(-0.15, -0.04)	0.001		-0.07	(-0.12, -0.02)	0.013		-0.07	(-0.12, -0.02)	0.013
Male gender (yes)	0.04	(-2.20, 2.28)	0.970		0.96	(-1.09, 3.01)	0.362		0.96	(-1.09, 3.01)	0.363
NACA score	7.80	(4.33, 11.26)	<0.001		6.08	(2.68, 9.48)	0.001		6.07	(2.67, 9.47)	0.001
Glasgow Coma Scale	-0.21	(-0.44, 0.02)	0.080		-0.04	(-0.26, 0.17)	0.689		-0.04	(-0.26, 0.17)	0.704
Treatment prior to HEMS (yes)	-2.56	(-5.35, 0.22)	0.072		-1.53	(-4.13, 1.06)	0.252		-1.51	(-4.09, 1.08)	0.257
Experience (years as specialist)	0.05	(-0.11, 0.20)	0.544		-0.02	(-0.16, 0.13)	0.836		-	-	-
Analgesics (yes )	-0.43	(-2.87, 2.01)	0.730		-2.60	(-4.87, -0.34)	0.026		-2.60	(-4.87, -0.34)	0.026
Intubation (yes )	8.92	(6.96, 10.88)	<0.001		8.25	(6.27, 10.24)	<0.001		8.26	(6.28, 10.25)	<0.001
Helicopter transport (yes)	5.59	(3.61, 7.58)	<0.001		6.32	(4.44, 8.20)	<0.001		6.31	(4.44, 8.19)	<0.001
a Year in study period refers to year 1-5 of the period from 2009 to 2013. b Variables chosen for final model included multivariate regression analyses of variables that differed significantly, in addition to gender. Estimates were adjusted for HEMS Base, and the individual physician was used as a random effect. B = unstandardized coefficient in the regression model (minutes per unit of predictor…
